# Supplementary material for: Hybrid organic–inorganic compounds based on the Lindqvist polyoxomolybdate and dioxomolybdenum(vi) complexes
Source: Royal Society of Chemistry journal article supplement (doi:10.1039/c0ce00927j), 2011-01-01
Supplement: c0ce00927j.pdf [file c0ce00927j.pdf]

## Electronic Supplementary Information (ESI)

### Hybrid organic-inorganic compounds based on Lindqvist polyoxomolybdate and dioxomolybdenum(VI) complexes

Višnja Vrdoljak,\* Biserka Prugovečki, Dubravka Matković-Čalogović and Jana Pisk

Department of Chemistry, Faculty of Science, University of Zagreb, Horvatovac 102a, 10000 Zagreb, Croatia

#### Contents:

|                                                                                                                                |       |
|--------------------------------------------------------------------------------------------------------------------------------|-------|
| <b>Fig. S1</b> Photos of <b>1a</b> and <b>2a</b> .....                                                                         | 1     |
| <b>Fig. S2</b> TG and DSC curves. ....                                                                                         | 2     |
| <b>Fig. S3-S5</b> Powder X-ray diffraction patterns. ....                                                                      | 2, 3  |
| <b>Fig. S6</b> Favourably orientated POM anion to the nearest Mo(VI) centres of the [MoO <sub>2</sub> HL] <sup>+</sup> cations | 4     |
| <b>Fig. S7</b> IR spectra .....                                                                                                | 5     |
| <b>Fig. S8</b> ORTEP plot of the crystal structures.....                                                                       | 6     |
| <b>Fig. S9- S13</b> Figures of the crystal structures.....                                                                     | 7-10  |
| <b>Table S1</b> Selected bond lengths and angles.....                                                                          | 11    |
| <b>Table S2-S7</b> Geometry of hydrogen bonds.....                                                                             | 12-14 |
| <b>Table S8</b> $\pi\cdots\pi$ interactions.....                                                                               | 15    |

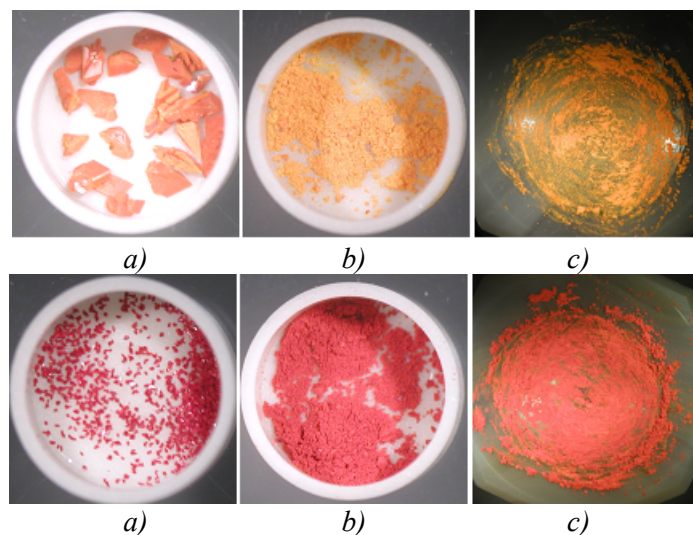

**Fig. S1** Photos of **1a** (upper part) and **2a** (lower part): a) of single crystals; b) upon initial grinding; c) after 10 min of grinding by an agate mortar and pestle. Loss of the coordinated solvent molecules by grinding at room temperature was evident by a “wet” appearance of the sample.

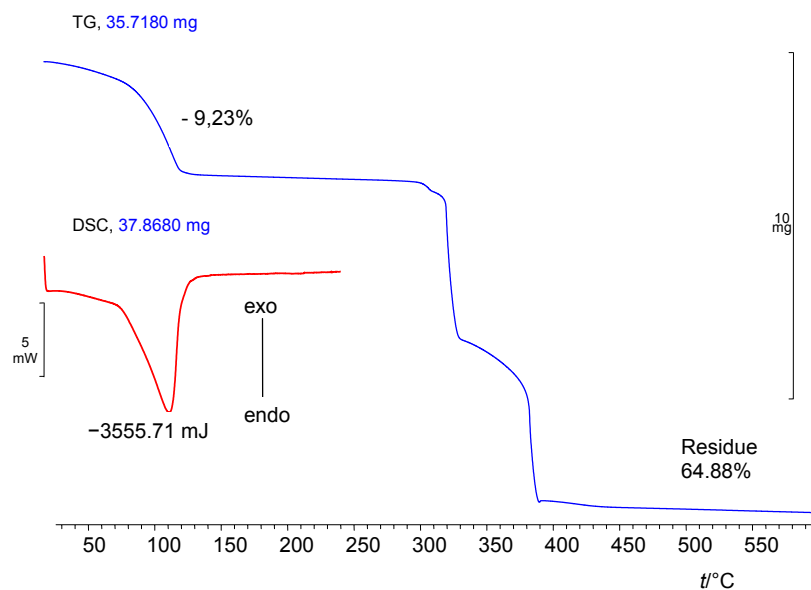

**Fig. S2.** TG and DSC curves of the crystalline sample **1a** under the O<sub>2</sub> atmosphere. Experiment was recorded with a heating rate of 5 °C min<sup>-1</sup> in a dynamic atmosphere with a flow rate of 200 cm<sup>3</sup> min<sup>-1</sup>.

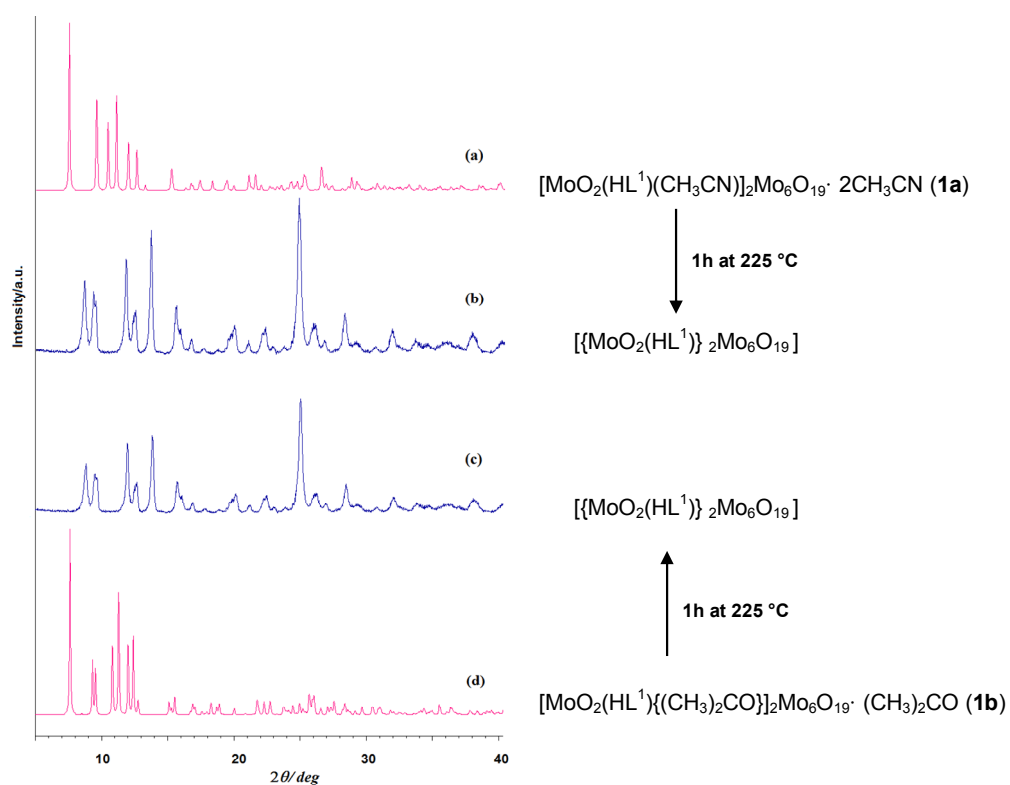

**Fig. S3** Powder X-ray diffraction patterns of: (a) **1a** calculated from the X-ray single-crystal structure; (b) sample obtained after heating of **1a** at 225 °C for 1 h; (c) sample obtained after heating of **1b** at 225 °C for 1 h; (d) **1b** calculated from the X-ray single-crystal structure.

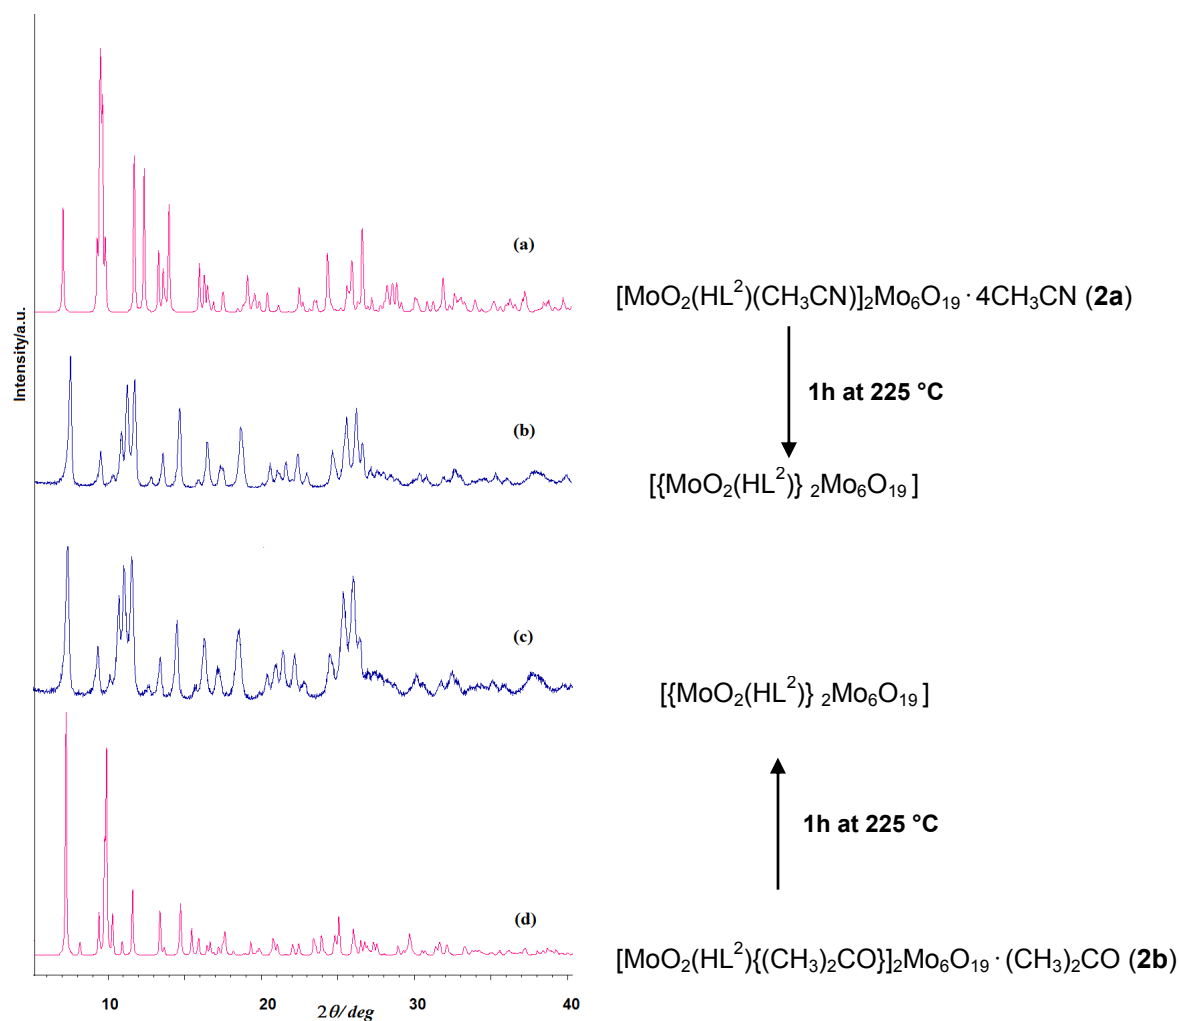

**Fig. S4** Powder X-ray diffraction patterns of: (a) **2a** calculated from the X-ray single-crystal structure; (b) sample obtained after heating of **2a** at 225 °C for 1 h; (c) sample obtained after heating of **2b** at 225 °C for 1 h; (d) **2b** calculated from the X-ray single-crystal structure.

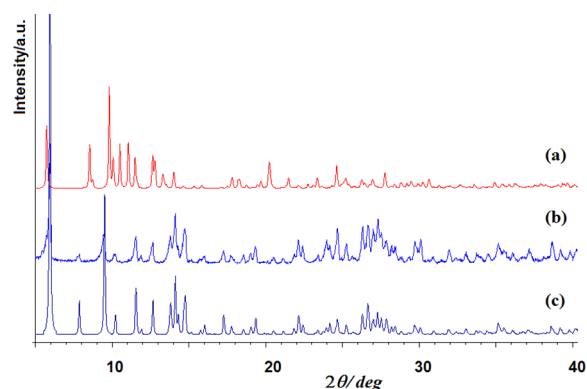

**Fig. S5** XRPD patterns of: (a) **3b** calculated from the X-ray single-crystal structure; (b) product obtained upon heating of **3b** at 225 °C for 1 h; (c) **3·4H<sub>2</sub>O** calculated from the X-ray single-crystal structure.

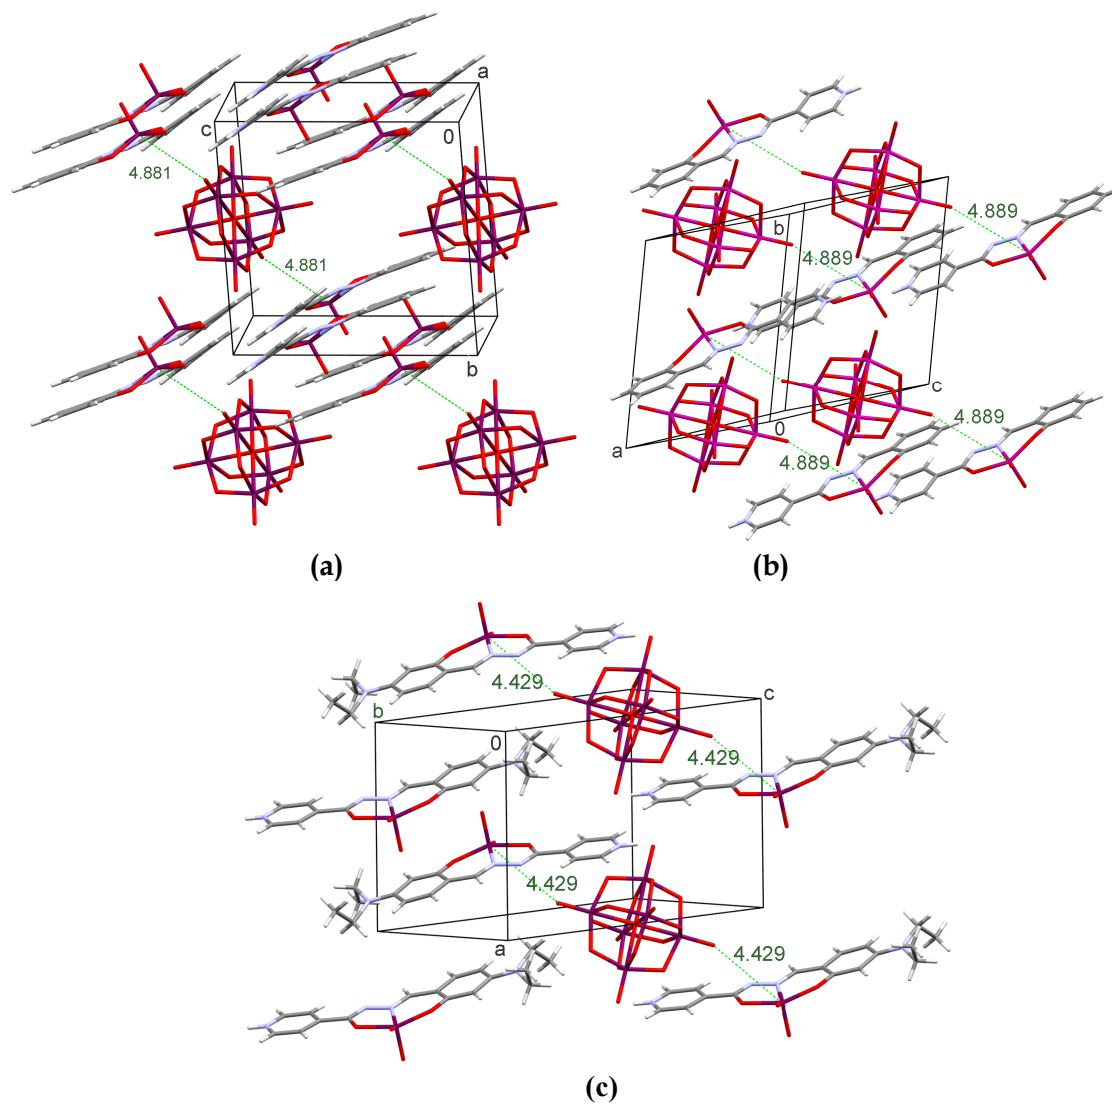

**Fig. S6** Packing of ions in the unit cell of (a) **1a**, (b) **1b** and (c) **3b** with the solvent molecule omitted;  $\text{Mo}_{\text{cation}} \cdots \text{O}_{\text{POM}}$  atoms from neighboring ions are connected by green dashed lines (the  $\text{Mo} \cdots \text{O}$  distance is 4.881(2) Å for **1a**, 4.889(2) for **1b**, 4.789(2) Å for **2a**, 4.967(2) Å **2b** and 4.429(2) Å for **3b**).

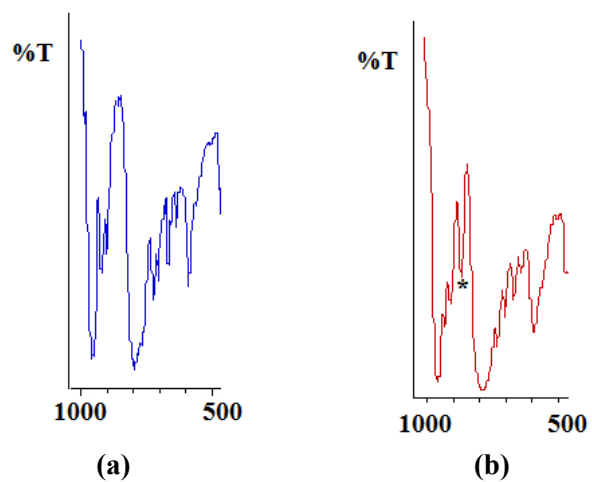

**Fig. S7** IR spectra of (a) [MoO₂(HL¹)(CH₃CN)]₂Mo₆O₁₉ (**1a**) and (b) [{MoO₂(HL¹)}₂Mo₆O₁₉] obtained upon heating of the crystalline sample of **1a** for 1 hour at 225 °C. Appearance of a new band in the IR spectra is labelled with \*.

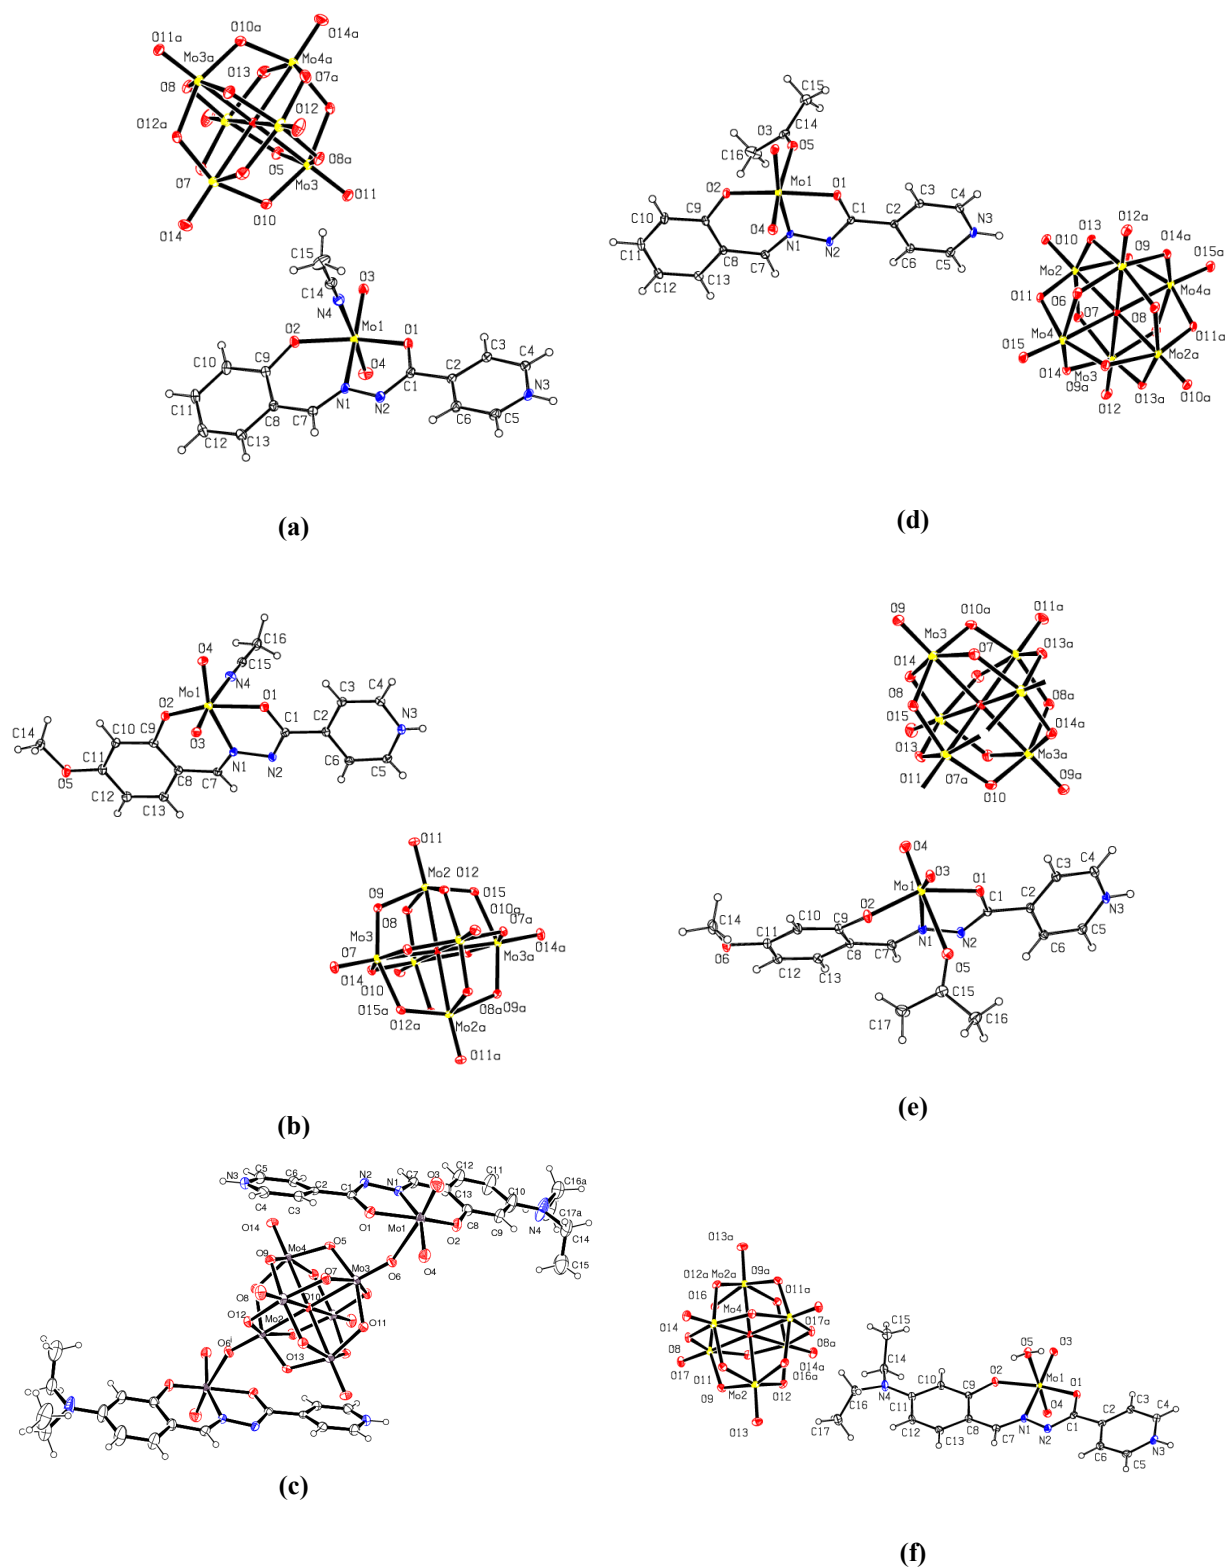

**Fig. S8** ORTEP plots of the crystal structures of: (a) **1a**, (b) **2a**, (c) **3·4H<sub>2</sub>O** (d) **1b**, (e) **2b**, and (f) **3b**. Displacement ellipsoids of non-hydrogen atoms are drawn at the 30% probability level, the solvent molecules are omitted for clarity.

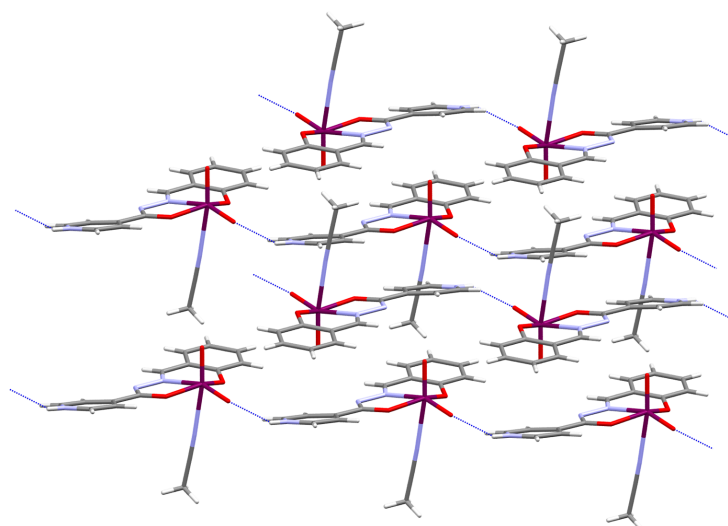

(a)

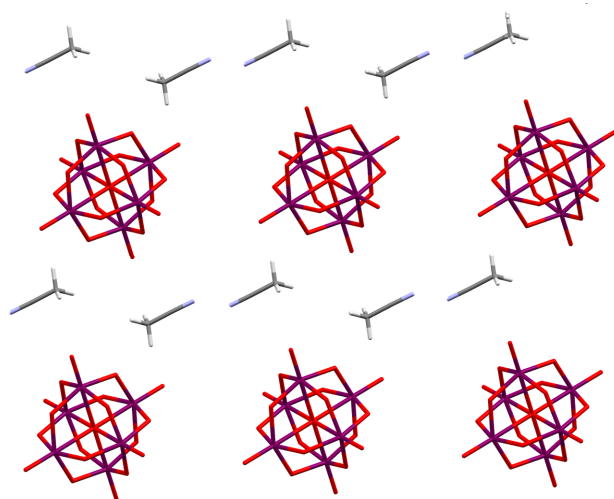

(b)

**Fig. S9** (a) Metal-organic layer of **1a**; complex cations are connected by blue dashed lines representing hydrogen bonds; (b) POM/solv layer with only one part of the disordered acetonitrile molecule shown. Its occupancy is 0.5.

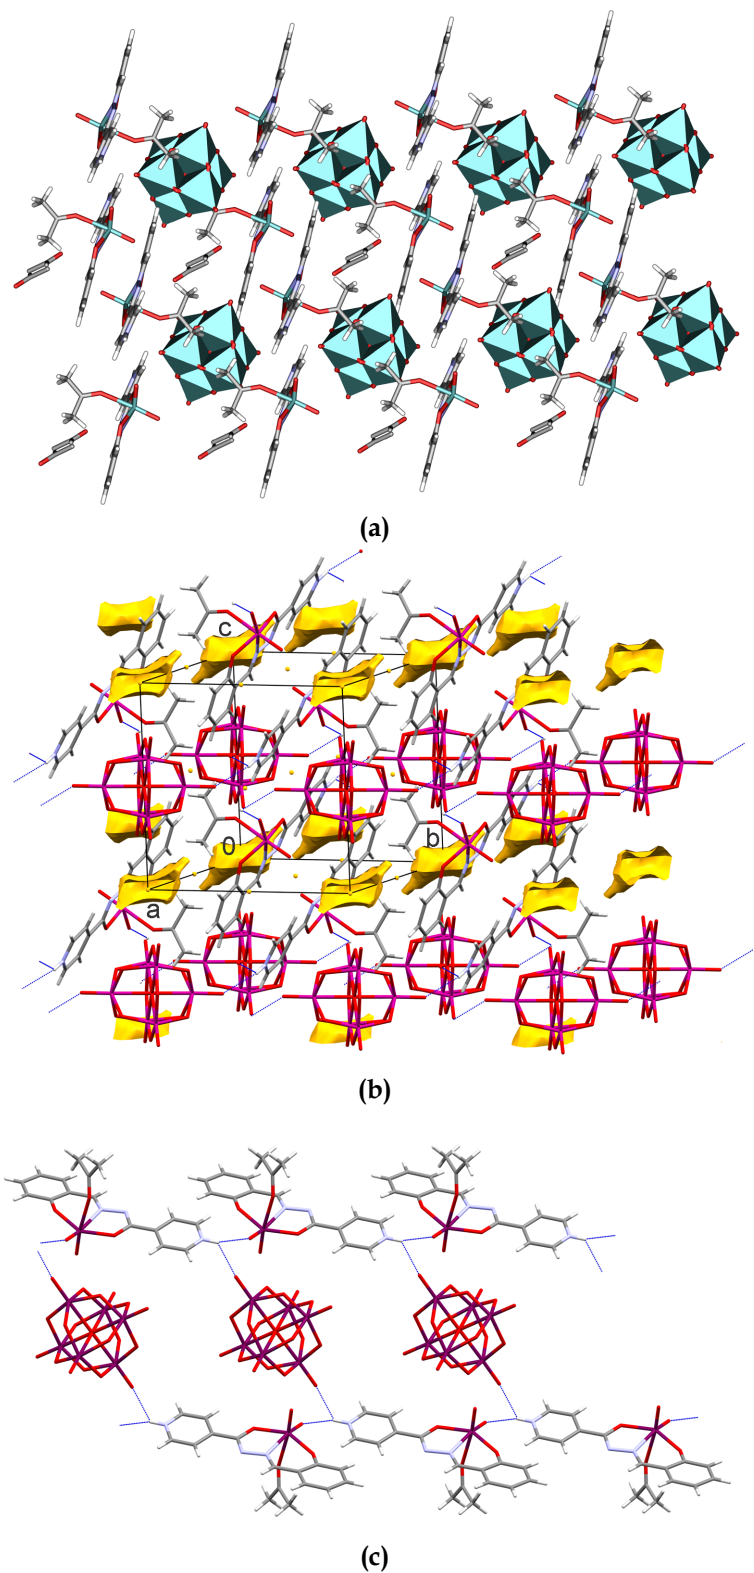

**Fig. S10** (a) Structure of **1b** shown along the *a* axis. Lindqvist polyoxomolybdate anions are represented as blue-green polyhedra. The alternating metal-organic and POM/solv layers can be seen. (b) Packing of the ions in the unit cell. The solvent acetone molecules are omitted and the void channels are shown in yellow (the search sphere was 1.2 Å). (c) Hydrogen bond pattern (blue dashed lines) interconnecting the organic and POM/solv layers.



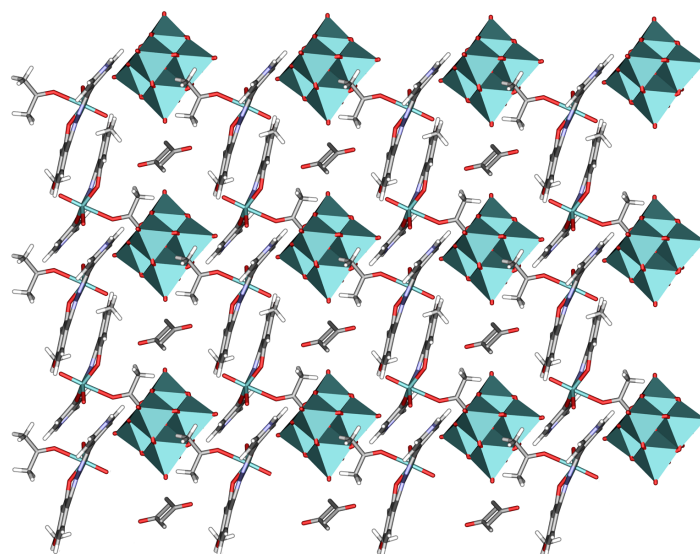

(a)

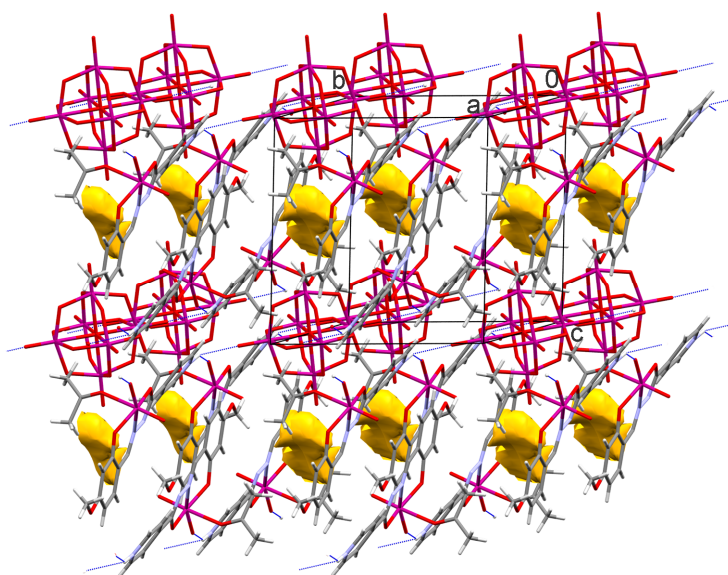

(b)

**Fig. S11** (a) Structure of **2b** shown along the *a* axis. Lindqvist polyoxomolybdate anions are represented as blue-green polyhedra. The alternating metal-organic and POM/solv layers can be seen. (b) Packing of the ions in the unit cell. The solvent acetone molecules are omitted and the void channels are shown in yellow (the search sphere was 1.2 Å).

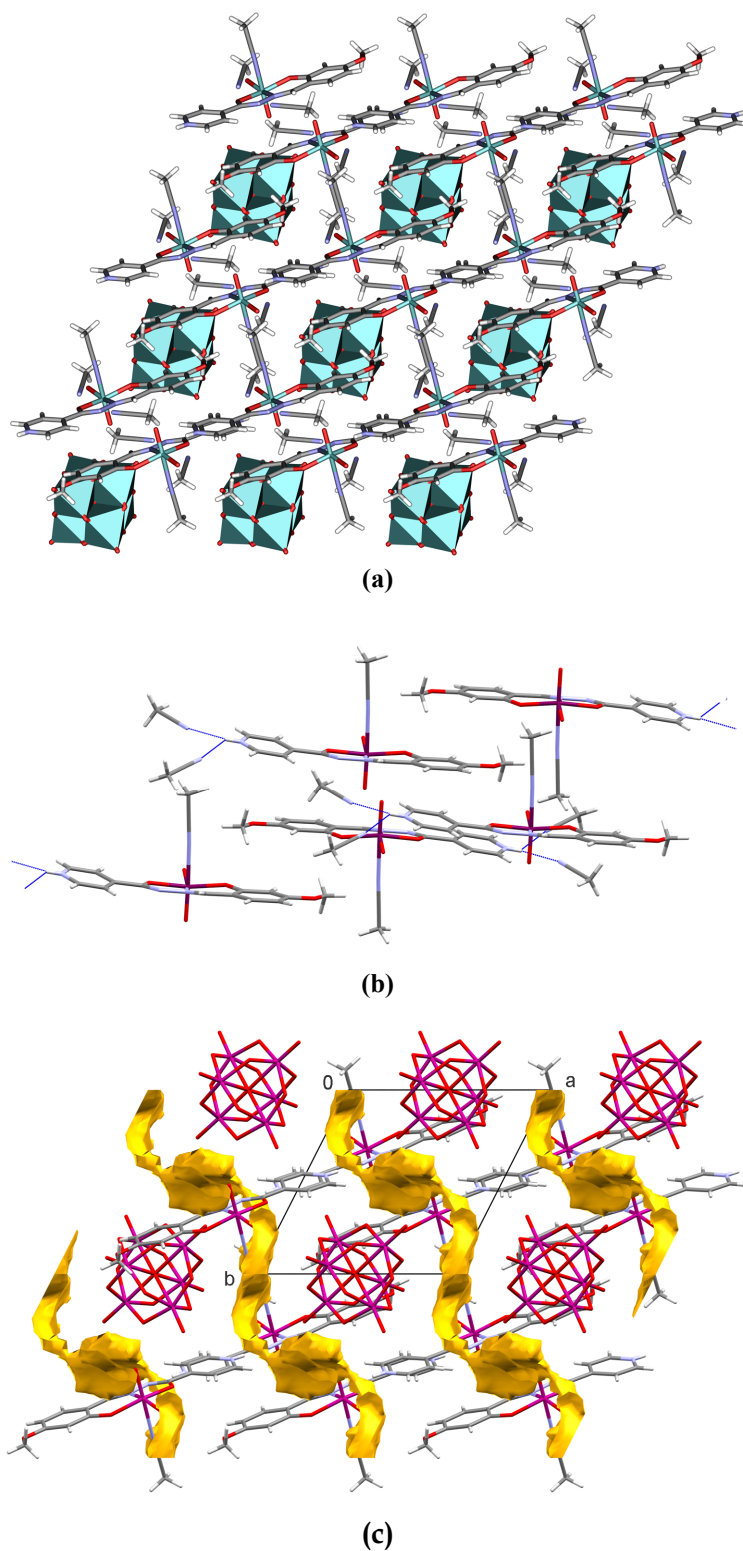

**Fig. S12** (a) Structure of **2a** shown along the *c* axis. Lindqvist polyoxomolybdate anions are represented as blue-green polyhedra. The alternating metal-organic and POM/solv layers can be seen. (b) Hydrogen bond pattern (blue dashed lines) in the organic/solv layer of **2a**. (c) Packing of the ions in the unit cell. The solvent acetonitrile is omitted and the void channels are shown in yellow (the search sphere was 1.2 Å).

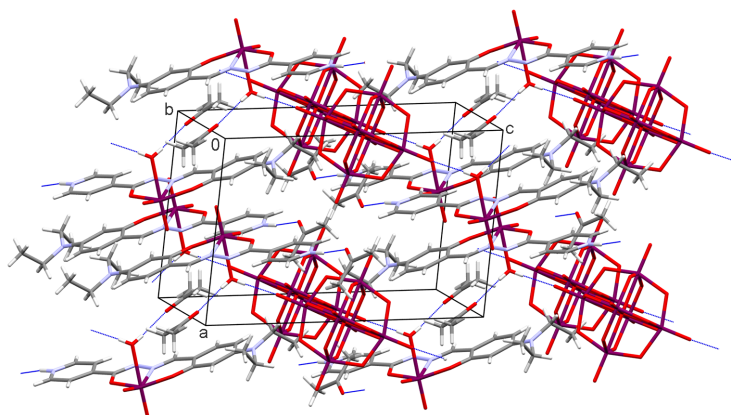

**Fig. 13** Packing diagram of **3b** with hydrogen bonds shown as blue dashed lines.

**Table S1.** Selected bond lengths (Å) and angles (°) for **1a**, **2a**, **3·4H<sub>2</sub>O**, **1b**, **2b** and **3b**

|                    | <b>1a</b>  | <b>2a</b>  | <b>3·4H<sub>2</sub>O</b> | <b>1b</b>  | <b>2b</b>  | <b>3b</b>  |
|--------------------|------------|------------|--------------------------|------------|------------|------------|
| Mo1-O1             | 2.0094(16) | 2.0217(16) | 1.991(3)                 | 2.0161(15) | 2.0091(17) | 2.0208(16) |
| Mo1-O2             | 1.9228(16) | 1.9305(18) | 1.916(3)                 | 1.9339(14) | 1.9425(17) | 1.9146(17) |
| Mo1-O3             | 1.7192(15) | 1.6975(18) | 1.707(4)                 | 1.7092(14) | 1.7163(17) | 1.7060(17) |
| Mo1-O4             | 1.6803(15) | 1.6970(15) | 1.690(4)                 | 1.6847(14) | 1.6879(16) | 1.6955(19) |
| Mo1-N1             | 2.2343(18) | 2.2365(19) | 2.197(4)                 | 2.2356(16) | 2.227(2)   | 2.218(2)   |
| Mo1-X <sup>b</sup> | 2.4227(18) | 2.397(2)   | 2.573(3)                 | 2.4026(14) | 2.3751(16) | 2.413(2)   |
| N1-N2              | 1.397(3)   | 1.403(3)   | 1.394(5)                 | 1.396(2)   | 1.392(3)   | 1.390(3)   |
| N1-C7              | 1.289(3)   | 1.295(3)   | 1.313(6)                 | 1.291(2)   | 1.291(3)   | 1.306(3)   |
| N2-C1              | 1.294(3)   | 1.297(3)   | 1.290(6)                 | 1.293(2)   | 1.290(3)   | 1.292(3)   |
| O1-Mo1-O2          | 148.70(6)  | 151.46(6)  | 149.41(14)               | 147.85(6)  | 150.01(7)  | 150.16(7)  |
| O1-Mo1-O3          | 97.28(7)   | 94.61(8)   | 94.74(15)                | 100.35(6)  | 99.80(7)   | 94.70(7)   |
| O1-Mo1-O4          | 98.47(8)   | 95.90(7)   | 99.56(16)                | 99.29(7)   | 97.93(8)   | 97.16(8)   |
| O1-Mo1-N1          | 72.21(6)   | 72.05(7)   | 72.50(14)                | 72.24(6)   | 72.00(7)   | 72.37(7)   |
| O2-Mo1-O3          | 101.55(7)  | 104.86(8)  | 101.19(17)               | 99.15(6)   | 99.99(8)   | 103.66(8)  |
| O2-Mo1-O4          | 99.50(7)   | 99.17(8)   | 100.58(17)               | 99.05(6)   | 97.90(8)   | 100.48(8)  |
| O2-Mo1-N1          | 81.06(7)   | 81.88(7)   | 81.24(15)                | 80.73(6)   | 81.41(7)   | 81.41(7)   |
| O3-Mo1-O4          | 107.25(7)  | 104.34(8)  | 106.7(2)                 | 107.15(7)  | 106.24(8)  | 104.95(9)  |
| O3-Mo1-N1          | 157.35(6)  | 154.96(7)  | 151.21(15)               | 159.81(6)  | 158.36(7)  | 154.85(8)  |
| O4-Mo1-N1          | 94.32(7)   | 98.18(7)   | 100.91(18)               | 92.72(6)   | 94.86(8)   | 98.15(8)   |
| O4-Mo1-X           | 170.07(8)  | 171.92(7)  | 171.87(17)               | 171.58(7)  | 171.20(8)  | 172.94(8)  |

<sup>b</sup>X = N4 in **1a** and **2a**; X = O6 in **3**; X = O5 in **1b**, **2b** and **3b**

**Table S2.** Geometry of hydrogen bonds (Å, °) for **1a**.

| D-H...A                    | D-H (Å) | H...A (Å) | D...A (Å) | D-H...A(°) |
|----------------------------|---------|-----------|-----------|------------|
| N3-H3...O3 <sup>a</sup>    | 0.86    | 2.16      | 2.810(3)  | 132        |
| N3-H3...O11 <sup>b</sup>   | 0.86    | 2.50      | 3.023(2)  | 120        |
| C5-H5...O2 <sup>a</sup>    | 0.93    | 2.55      | 3.302(3)  | 139        |
| C11-H11...O12 <sup>c</sup> | 0.93    | 2.50      | 3.365(3)  | 155        |
| C13-H13...O13 <sup>d</sup> | 0.93    | 2.51      | 3.429(3)  | 168        |
| C15-H15b...O8 <sup>e</sup> | 0.96    | 2.40      | 3.360(4)  | 173        |

<sup>a</sup> 1+x,y,z; <sup>b</sup> x,-1+y,z; <sup>c</sup> -x,1-y,1-z; <sup>d</sup> 1-x,1-y,1-z; <sup>e</sup> -x,1-y,-z

**Table S3.** Geometry of hydrogen bonds (Å, °) for **2a**.

| D-H...A                     | D-H (Å) | H...A (Å) | D...A (Å) | D-H...A(°) |
|-----------------------------|---------|-----------|-----------|------------|
| N3-H31...N5 <sup>a</sup>    | 0.75(2) | 2.23(2)   | 2.856(3)  | 143(2)     |
| N3-H31...N6 <sup>a</sup>    | 0.75(2) | 2.68(2)   | 3.186(3)  | 156.92(18) |
| C3-H3...O1                  | 0.89(2) | 2.43(2)   | 2.791(3)  | 104.5(19)  |
| C4-H4...O4 <sup>a</sup>     | 0.87(3) | 2.41(3)   | 3.188(3)  | 148.4(19)  |
| C5-H5...O11 <sup>b</sup>    | 0.81(2) | 2.54(2)   | 3.256(3)  | 149(2)     |
| C5-H5...N6 <sup>a</sup>     | 0.81(2) | 2.62(2)   | 3.197(3)  | 129(2)     |
| C7-H7...O4 <sup>c</sup>     | 0.95(2) | 2.41(2)   | 2.978(3)  | 118.0(17)  |
| C14-H14B...O11 <sup>d</sup> | 1.00(3) | 2.56(3)   | 3.520(3)  | 161(2)     |
| C16-H16A...O3 <sup>e</sup>  | 1.03(4) | 2.59(3)   | 2.941(3)  | 100(2)     |
| C17-H17B...O9 <sup>d</sup>  | 0.96(3) | 2.57(3)   | 3.417(4)  | 146(2)     |

<sup>a</sup> -x,1-y,1-z; <sup>b</sup> 1-x,2-y,1-z; <sup>c</sup> 1-x,1-y,1-z; <sup>d</sup> x,-1+y,z; <sup>e</sup> -x,-y,1-z

**Table S4.** Geometry of hydrogen bonds (Å, °) for **3·4H<sub>2</sub>O**.

| D-H...A                     | D-H (Å) | H...A (Å) | D...A (Å) | D-H...A(°) |
|-----------------------------|---------|-----------|-----------|------------|
| O1W-H11W...O2W              | 0.89    | 2.15      | 2.886(11) | 140        |
| O1W-H12W...O2W <sup>a</sup> | 0.88    | 2.25      | 3.090(10) | 159        |
| O2W-H21W...O3               | 0.85    | 2.24      | 3.071(10) | 168        |
| N3-H3...O1W <sup>b</sup>    | 0.86    | 1.91      | 2.762(6)  | 171        |
| C4-H4...O3 <sup>c</sup>     | 0.93    | 2.52      | 3.259(7)  | 137        |
| C6-H6...O8 <sup>d</sup>     | 0.93    | 2.59      | 3.189(7)  | 122        |
| C7-H7...O11 <sup>d</sup>    | 0.93    | 2.49      | 3.313(6)  | 148        |
| C3-H31...O8 <sup>e</sup>    | 0.93    | 2.54      | 3.270(6)  | 135        |

<sup>a</sup>2-x,-1/2+y,1/2-z; <sup>b</sup>x,1/2-y,-1/2+z; <sup>c</sup>2-x,1-y,-z; <sup>d</sup>x,-1+y,-1+z; <sup>e</sup>2-x,1-y,1-z

**Table S5.** Geometry of hydrogen bonds (Å, °) for **1b**.

| D-H...A                     | D-H (Å) | H...A (Å) | D...A (Å) | D-H...A(°) |
|-----------------------------|---------|-----------|-----------|------------|
| C4-H4...O5 <sup>a</sup>     | 0.95    | 2.45      | 3.398(2)  | 178        |
| C5-H5...O2 <sup>b</sup>     | 0.95    | 2.47      | 3.385(3)  | 161        |
| C7-H7...O12 <sup>c</sup>    | 0.95    | 2.40      | 3.269(2)  | 152        |
| C10-H10...O16               | 0.95    | 2.49      | 2.967(5)  | 112        |
| C11-H11...O4 <sup>d</sup>   | 0.95    | 2.59      | 3.182(3)  | 121        |
| C12-H12...O11 <sup>e</sup>  | 0.95    | 2.56      | 3.231(2)  | 128        |
| C13-H13...O12 <sup>c</sup>  | 0.95    | 2.47      | 3.312(3)  | 148        |
| C15-H15A...O11 <sup>f</sup> | 0.98    | 2.58      | 3.478(4)  | 152        |
| C15-H15C...O13 <sup>a</sup> | 0.98    | 2.48      | 3.206(3)  | 131        |
| C16-H16A...O2               | 0.98    | 2.54      | 3.346(3)  | 139        |
| C18-H18C...O14 <sup>e</sup> | 0.98    | 2.49      | 3.376(5)  | 150        |
| N3-H3...O3 <sup>b</sup>     | 0.88    | 2.25      | 2.917(2)  | 132        |
| N3-H3...O10                 | 0.88    | 2.28      | 2.932(2)  | 130        |

<sup>a</sup>1-x,1-y,1-z; <sup>b</sup>-1+x,y,z; <sup>c</sup>-x,1-y,-z; <sup>d</sup>2-x,1-y,-z; <sup>e</sup>1-x,1-y,-z; <sup>f</sup>x,-1+y,z

**Table S6.** Geometry of hydrogen bonds (Å, °) for **2b**.

| D-H...A                     | D-H (Å) | H...A (Å) | D...A (Å) | D-H...A(°) |
|-----------------------------|---------|-----------|-----------|------------|
| N3-H3...O3 <sup>a</sup>     | 0.88    | 2.21      | 2.923(3)  | 138        |
| N3-H3...O11 <sup>a</sup>    | 0.88    | 2.28      | 2.847(3)  | 122        |
| C3-H3A...O9 <sup>b</sup>    | 0.95    | 2.43      | 3.201(3)  | 138        |
| C5-H5...O2 <sup>a</sup>     | 0.95    | 2.56      | 3.363(3)  | 143        |
| C6-H6...O17 <sup>a</sup>    | 0.95    | 2.31      | 3.240(4)  | 168        |
| C13-H13...O7 <sup>c</sup>   | 0.95    | 2.50      | 3.088(3)  | 126        |
| C14-H14A...O4 <sup>d</sup>  | 0.98    | 2.45      | 3.114(4)  | 125        |
| C14-H14A...O13 <sup>d</sup> | 0.98    | 2.56      | 3.444(4)  | 149        |
| C14-H14C...O17              | 0.98    | 2.22      | 3.190(5)  | 173        |
| C19-H19B...O15 <sup>d</sup> | 0.98    | 2.56      | 3.460(5)  | 153        |

<sup>a</sup>1+x,y,z; <sup>b</sup>1-x,2-y,2-z; <sup>c</sup>1+x,-1+y,-1+z; <sup>d</sup>1-x,1-y,1-z

**Table S7.** Geometry of hydrogen bonds (Å, °) for **3b**.

| D-H...A                     | D-H (Å) | H...A (Å) | D...A (Å) | D-H...A(°) |
|-----------------------------|---------|-----------|-----------|------------|
| O5-HW1...O17 <sup>a</sup>   | 0.78(4) | 2.09(4)   | 2.873(3)  | 177(5)     |
| O5-HW2...O6                 | 0.74(3) | 2.04(3)   | 2.776(4)  | 176(3)     |
| N3-H30...O7 <sup>b</sup>    | 0.86    | 1.91      | 2.756(3)  | 169        |
| C4-H4...O14                 | 0.93    | 2.49      | 3.117(3)  | 125        |
| C5-H5...O3 <sup>b</sup>     | 0.93    | 2.26      | 3.116(3)  | 153        |
| C6-H6...O4 <sup>c</sup>     | 0.93    | 2.49      | 3.319(3)  | 149        |
| C10-H10...O4 <sup>d</sup>   | 0.93    | 2.56      | 3.463(3)  | 163        |
| C12-H12...O11 <sup>c</sup>  | 0.93    | 2.47      | 3.331(3)  | 153        |
| C16-H16A...O13 <sup>c</sup> | 0.97    | 2.57      | 3.325(4)  | 134        |
| C16-H16B...O16 <sup>d</sup> | 0.97    | 2.52      | 3.294(3)  | 137        |

<sup>a</sup> 1+x,y,z; <sup>b</sup>x,-1+y,z; <sup>c</sup> 1-x,-y,-z; <sup>d</sup>1-x,1-y,-z

**Table S8.**  $\pi\cdots\pi$  interactions in the crystal structures of compounds **1a**, **1b**, **3·4H<sub>2</sub>O** and **3b**

|                          | CgX                   | CgY             | CgX-CgY (Å)              | Slippage (Å) |
|--------------------------|-----------------------|-----------------|--------------------------|--------------|
| <b>1a</b>                | Cg3 (N3, C2-C6)       | Cg4 (C8-C13)    | 3.6773(12) <sup>i</sup>  | 1.23         |
| <b>1b</b>                | Cg3 (N3, C2-C6)       | Cg4 (C8-C13)    | 3.6865(13) <sup>ii</sup> | 1.55         |
| <b>3·4H<sub>2</sub>O</b> | Cg1 (Mo1-O1-C1-N2-N1) | Cg3 (N3, C2-C6) | 3.660(3) <sup>iii</sup>  | 1.58         |
| <b>3b</b>                | Cg3 (N3, C2-C6)       | Cg4 (C8-C13)    | 3.7125(14) <sup>iv</sup> | 1.17         |

<sup>i</sup>-x,-y,1-z; <sup>ii</sup> 1-x, 1-y, -z; <sup>iii</sup>2-x,-y,-z; <sup>iv</sup>1-x,-y,-z
